# Supplementary material for: A direct physical interaction between Nanog and Sox2 regulates embryonic stem cell self-renewal
Source: PubMed Central journal article supplement (PMC3746198; doi:10.1038/emboj.2013.161), 2013-07-26

Figure 1A

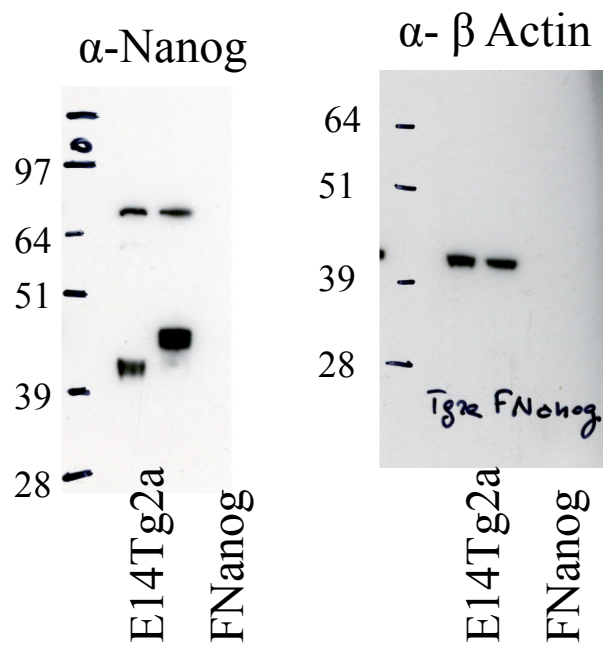

Figure 1E Top

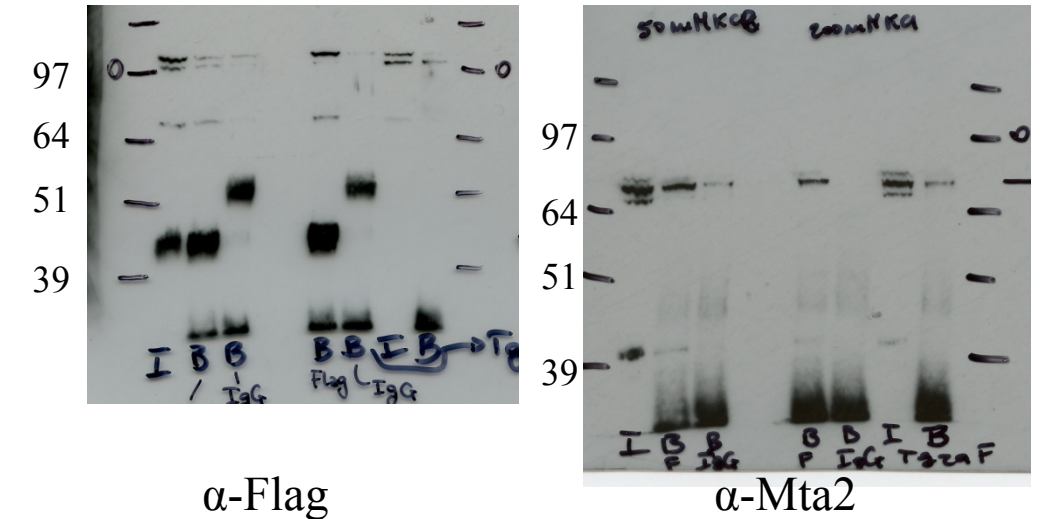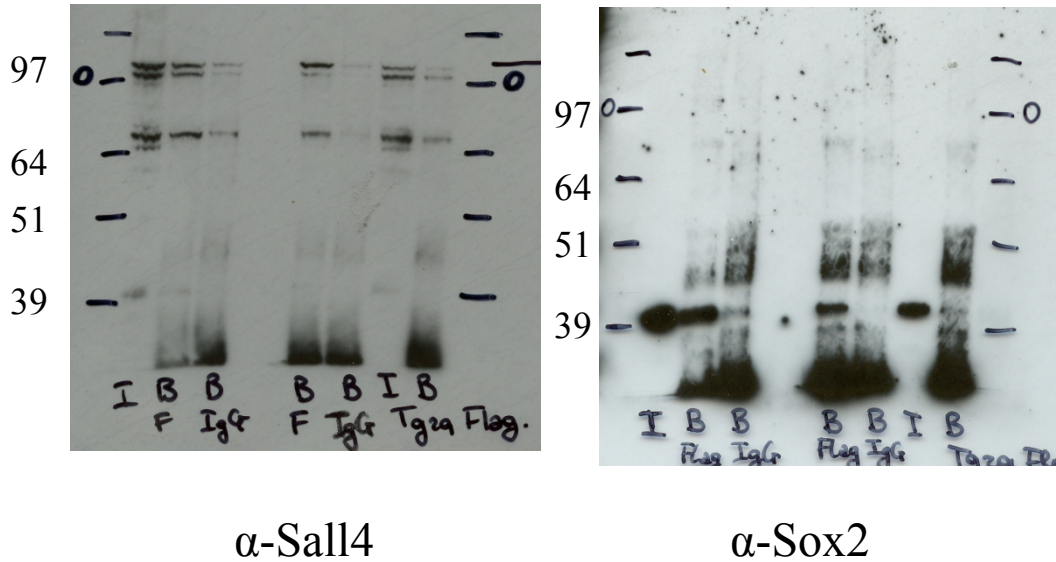

# Figure 1E Bottom

Darker immunoblot exposure for PolII IP, FLAG IP and Flag inputs

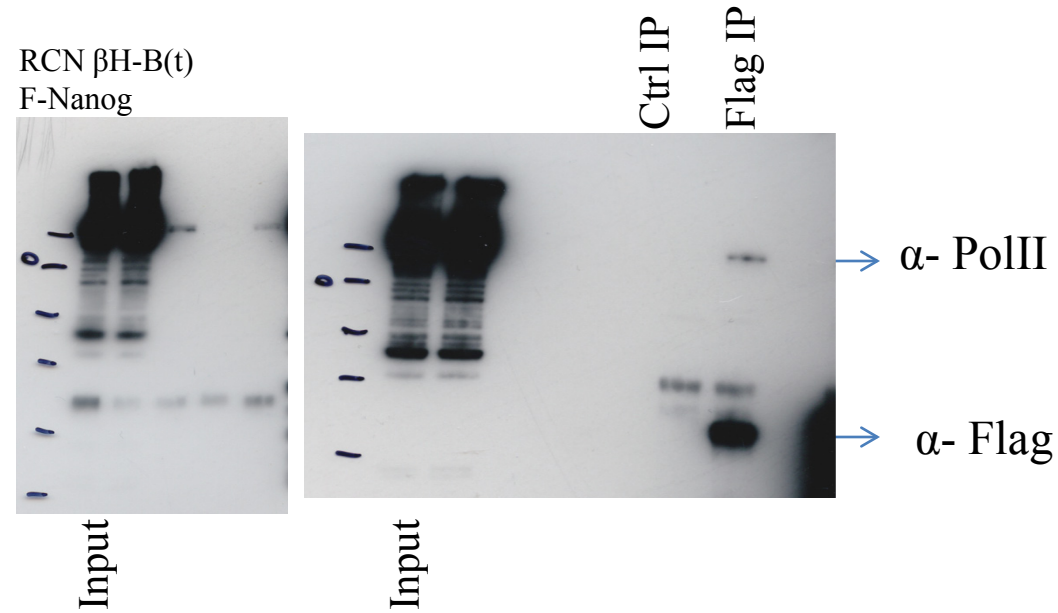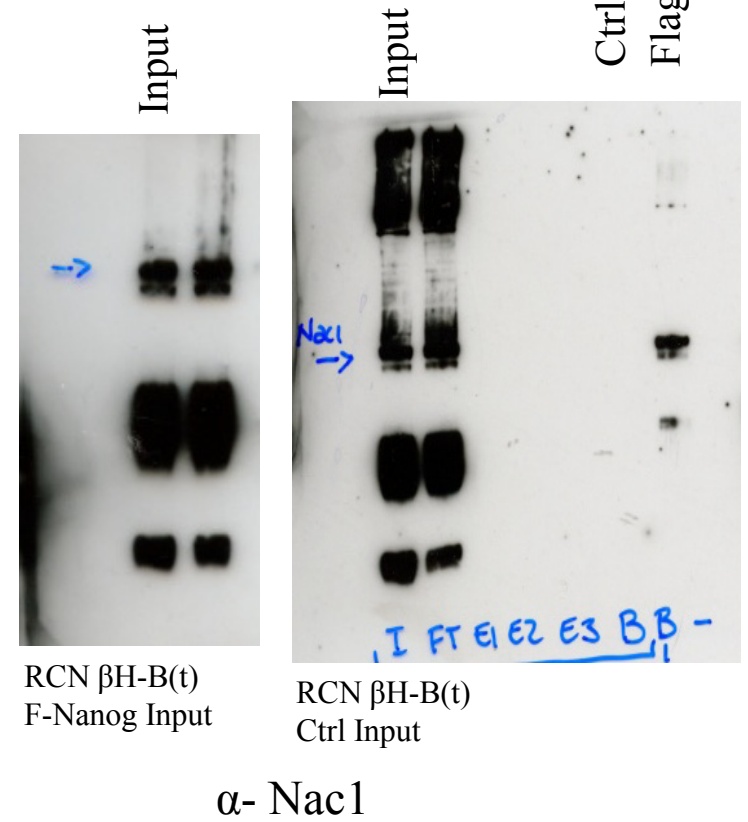

Lighter immunoblot exposure for PolII Inputs

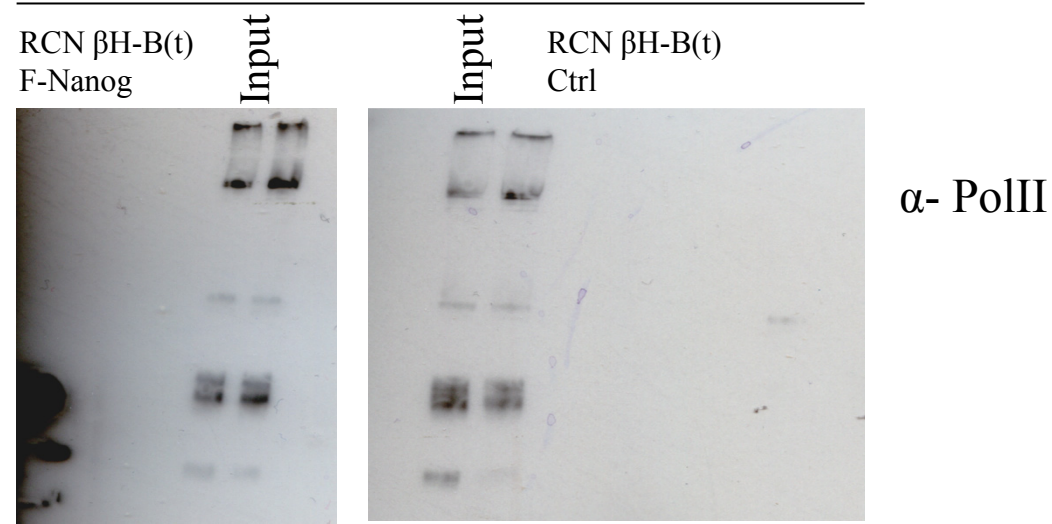

Supplement: emboj2013161df1.pdf [file emboj2013161df1.pdf]
