# Supplementary material for: A direct physical interaction between Nanog and Sox2 regulates embryonic stem cell self-renewal
Source: PubMed Central journal article supplement (PMC3746198; doi:10.1038/emboj.2013.161), 2013-07-26

Figure 4A

HA IP

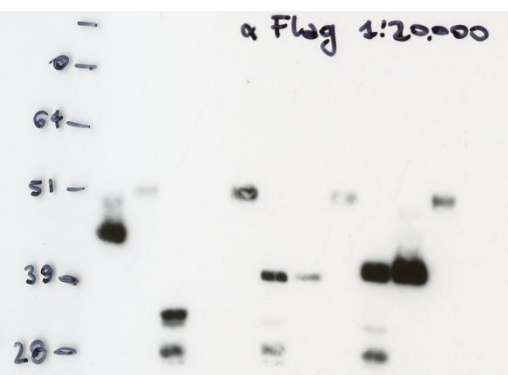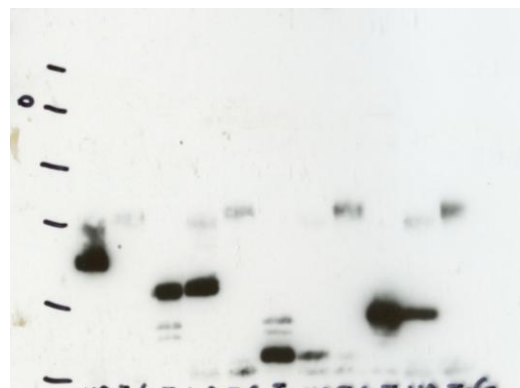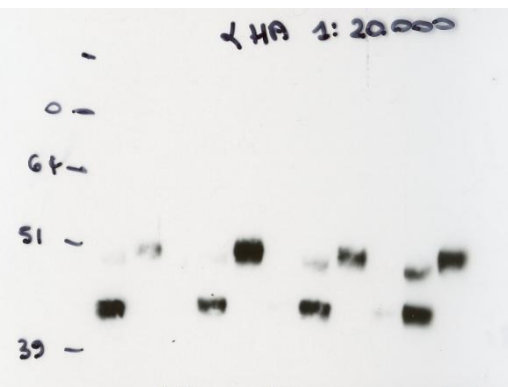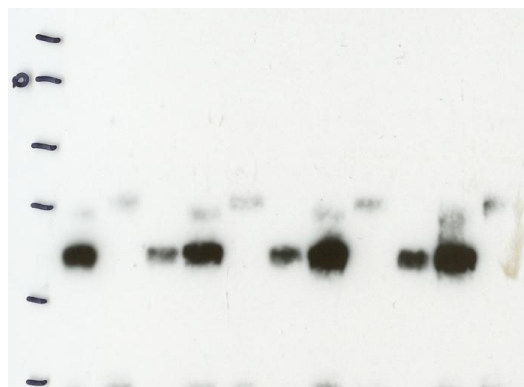

Figure 4B

HA IP

IB:  $\alpha$ -Flag

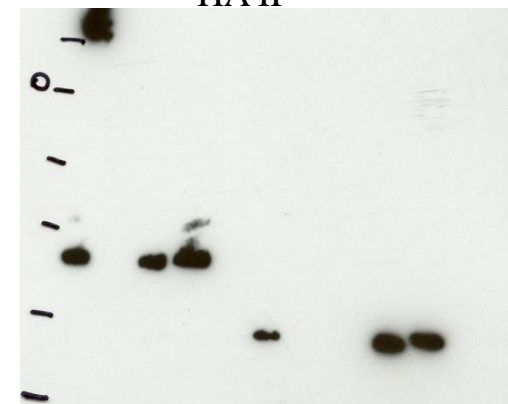

IB:  $\alpha$ -HA

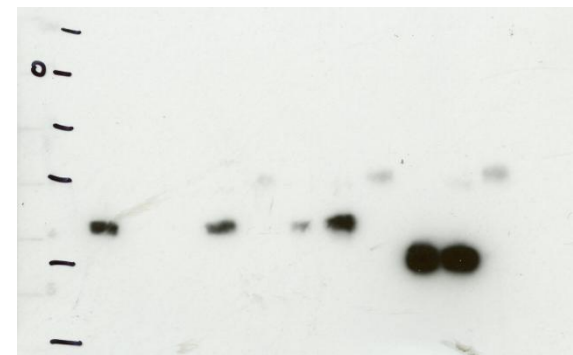

Supplement: emboj2013161df4.pdf [file emboj2013161df4.pdf]
