# Supplementary material for: A direct physical interaction between Nanog and Sox2 regulates embryonic stem cell self-renewal
Source: PubMed Central journal article supplement (PMC3746198; doi:10.1038/emboj.2013.161), 2013-07-26
Supplement: emboj2013161df5.pdf [file emboj2013161df5.pdf]

Figure 5B

HA IP

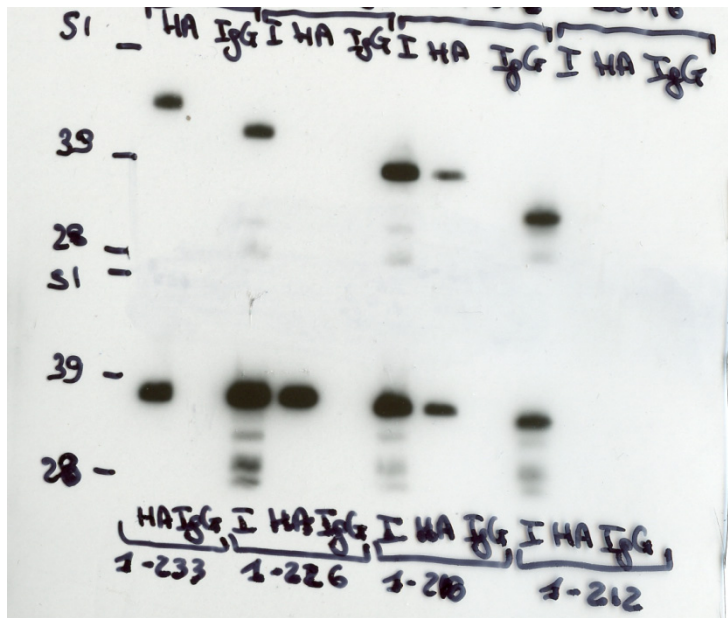

IB:  $\alpha$ - Flag

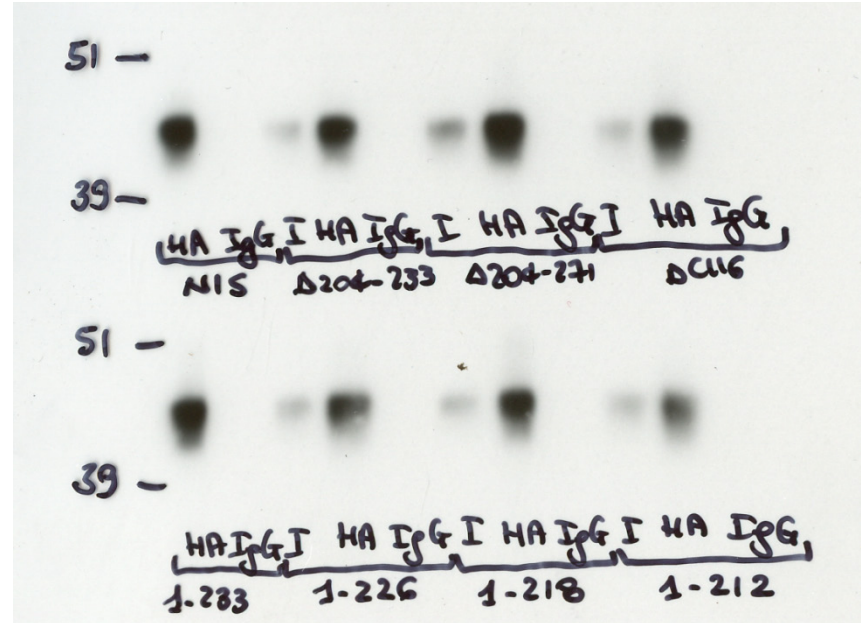

IB:  $\alpha$ - HA
