# Supplementary material for: A direct physical interaction between Nanog and Sox2 regulates embryonic stem cell self-renewal
Source: PubMed Central journal article supplement (PMC3746198; doi:10.1038/emboj.2013.161), 2013-07-26

Figure 6

Repeat 1 Repeat 2 Repeat 3  
 212-TS SQT<sup>Y</sup> MNG SPT<sup>Y</sup> SMS<sup>Y</sup> SQQG- 234

|     |            |    |                  |     |                  |                  |      |
|-----|------------|----|------------------|-----|------------------|------------------|------|
| M1  | SSS>A      | TS | AQT <sup>Y</sup> | MNG | APT <sup>Y</sup> | AMS <sup>Y</sup> | SQOG |
| M2  | TTS>A      | TS | SQA <sup>Y</sup> | MNG | SPA <sup>Y</sup> | SMA <sup>Y</sup> | SQOG |
| M3  | YYY>A      | TS | SQTA             | MNG | SPTA             | SMSA             | SQOG |
| M4  | Rep1>A     | TS | AQAA             | MNG | SPTY             | SMSY             | SQOG |
| M5  | Rep2>A     | TS | SQTY             | MNG | APAA             | SMSY             | SQOG |
| M6  | Rep3>A     | TS | SQTY             | MNG | SPTY             | AMAA             | SQOG |
| M7  | Rep1+2>A   | TS | AQAA             | MNG | APAA             | SMSY             | SQOG |
| M8  | Rep1+3>A   | TS | AQAA             | MNG | SPTY             | AMAA             | SQOG |
| M9  | Rep2+3>A   | TS | SQTY             | MNG | APAA             | AMAA             | SQOG |
| M10 | Rep1+2+3>A | TS | AQAA             | MNG | APAA             | AMAA             | SQOG |

HA IP

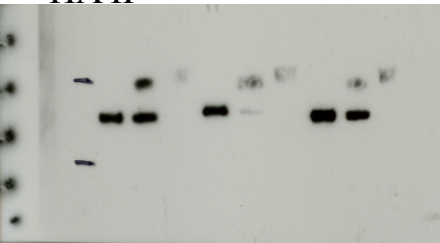

IB: α- Flag

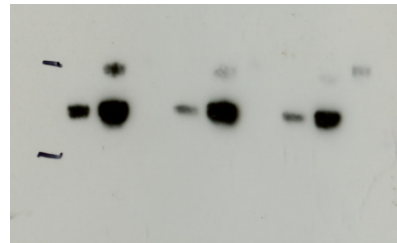

IB: α- HA

YYY>A TS SQTA MNG SPTA SMSA SQOG

YYY>F TS SQT<sup>F</sup> MNG SPT<sup>F</sup> SMS<sup>F</sup> SQOG

HA IP

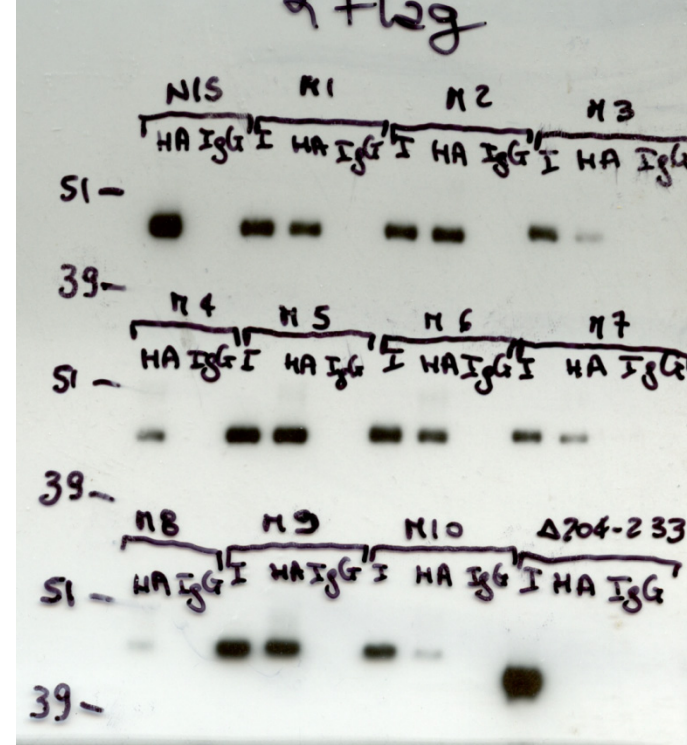

IB: α- Flag

IB: α- HA

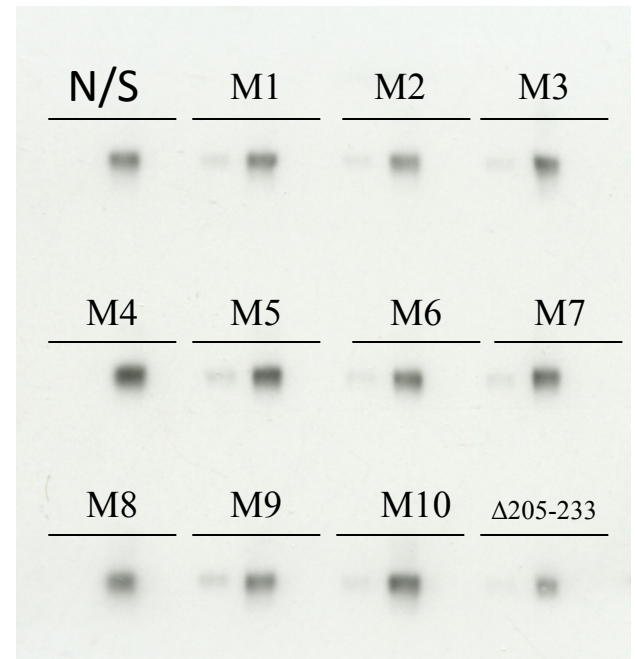

Supplement: emboj2013161df6.pdf [file emboj2013161df6.pdf]
