# Supplementary material for: A direct physical interaction between Nanog and Sox2 regulates embryonic stem cell self-renewal
Source: PubMed Central journal article supplement (PMC3746198; doi:10.1038/emboj.2013.161), 2013-07-26

Figure 7A left

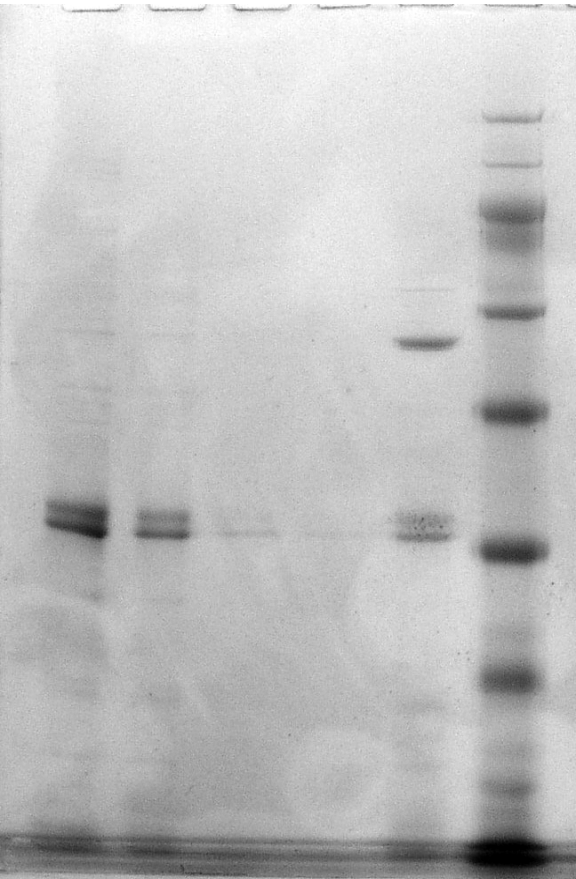

Figure 7A  $\alpha$ -Nanog

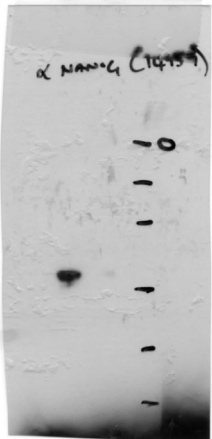

Figure 7A  $\alpha$ -sox2

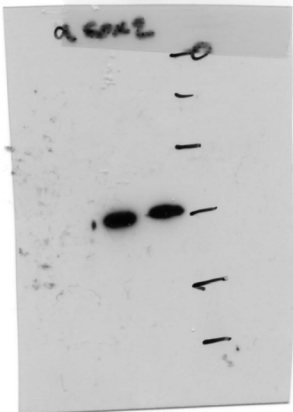

Figure 7B

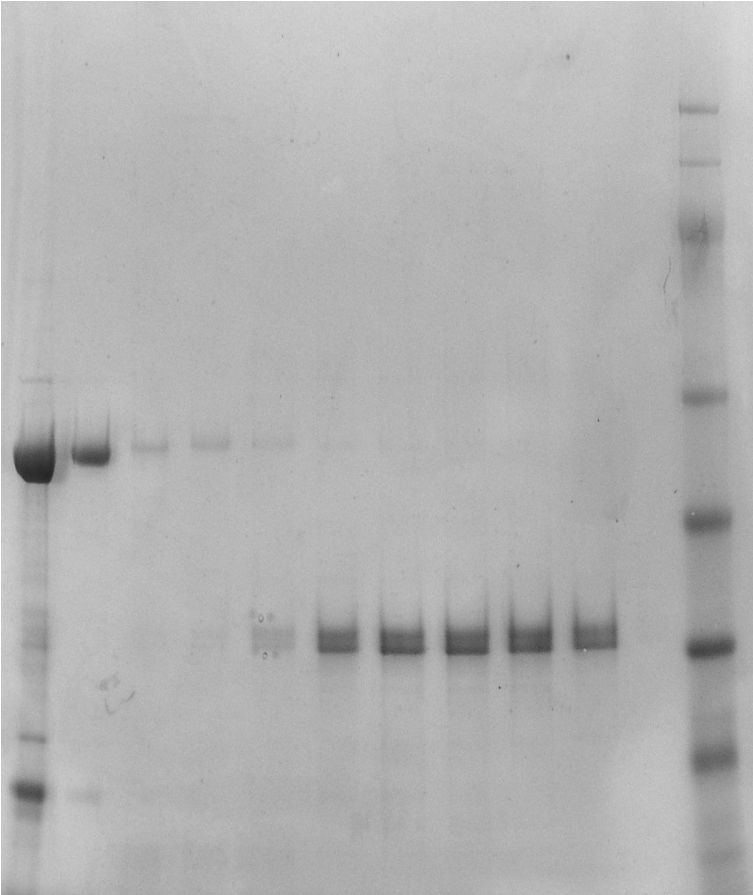

Supplement: emboj2013161df7.pdf [file emboj2013161df7.pdf]
